# Supplementary material for: Syntheses and biological evaluation of99mTc-HYNIC-fatty acid complexes for myocardial imaging
Source: Royal Society of Chemistry journal article supplement (doi:10.1039/c5ra12683e), 2015-01-01

11C-HYNIC-BOC

exp2 s2pu1

| SAMPLE              |                | DEC. & VT  |          |
|---------------------|----------------|------------|----------|
| date                | Mar 7 2013     | dn         | H1       |
| solvent             | CD3OD          | dof        | 0        |
| file                | /export/home/~ | dm         | nnn      |
| vnmr1/2013/March/E~ |                | dmm        | c        |
| xternal/BARC-Tiwar~ |                | dmf        | 200      |
| i/11C-HYNIC-BOC.fi~ |                |            |          |
|                     | d              | lb         | 0.20     |
|                     | fn             |            | not used |
| ACQUISITION         |                | PROCESSING |          |
| sfrq                | 299.951        |            |          |
| tn                  | H1             | werr       |          |
| at                  | 2.000          | wexp       |          |
| np                  | 23980          | wbs        |          |
| sw                  | 5995.2         | wnt        |          |
| fb                  | not used       |            |          |
|                     |                | DISPLAY    |          |
| bs                  | 2              | sp         | -29.5    |
| pw                  | 3.0            | wp         | 3631.4   |
| pw                  | 3.0            | vs         | 14866    |
| tpwr                | 60             | sc         | 0        |
| d1                  | 0              | wc         | 250      |
| tof                 | 900.0          | hzmm       | 23.98    |
| nt                  | 2400           | is         | 49774.49 |
| ct                  | 506            | rfl        | 644.3    |
| alock               | n              | rfl        | 0        |
| gain                | 6              | th         | 3        |
|                     | FLAGS          | ins        | 1.000    |
| il                  | n              | ai         | ph       |
| in                  | n              |            |          |
| dp                  | y              |            |          |

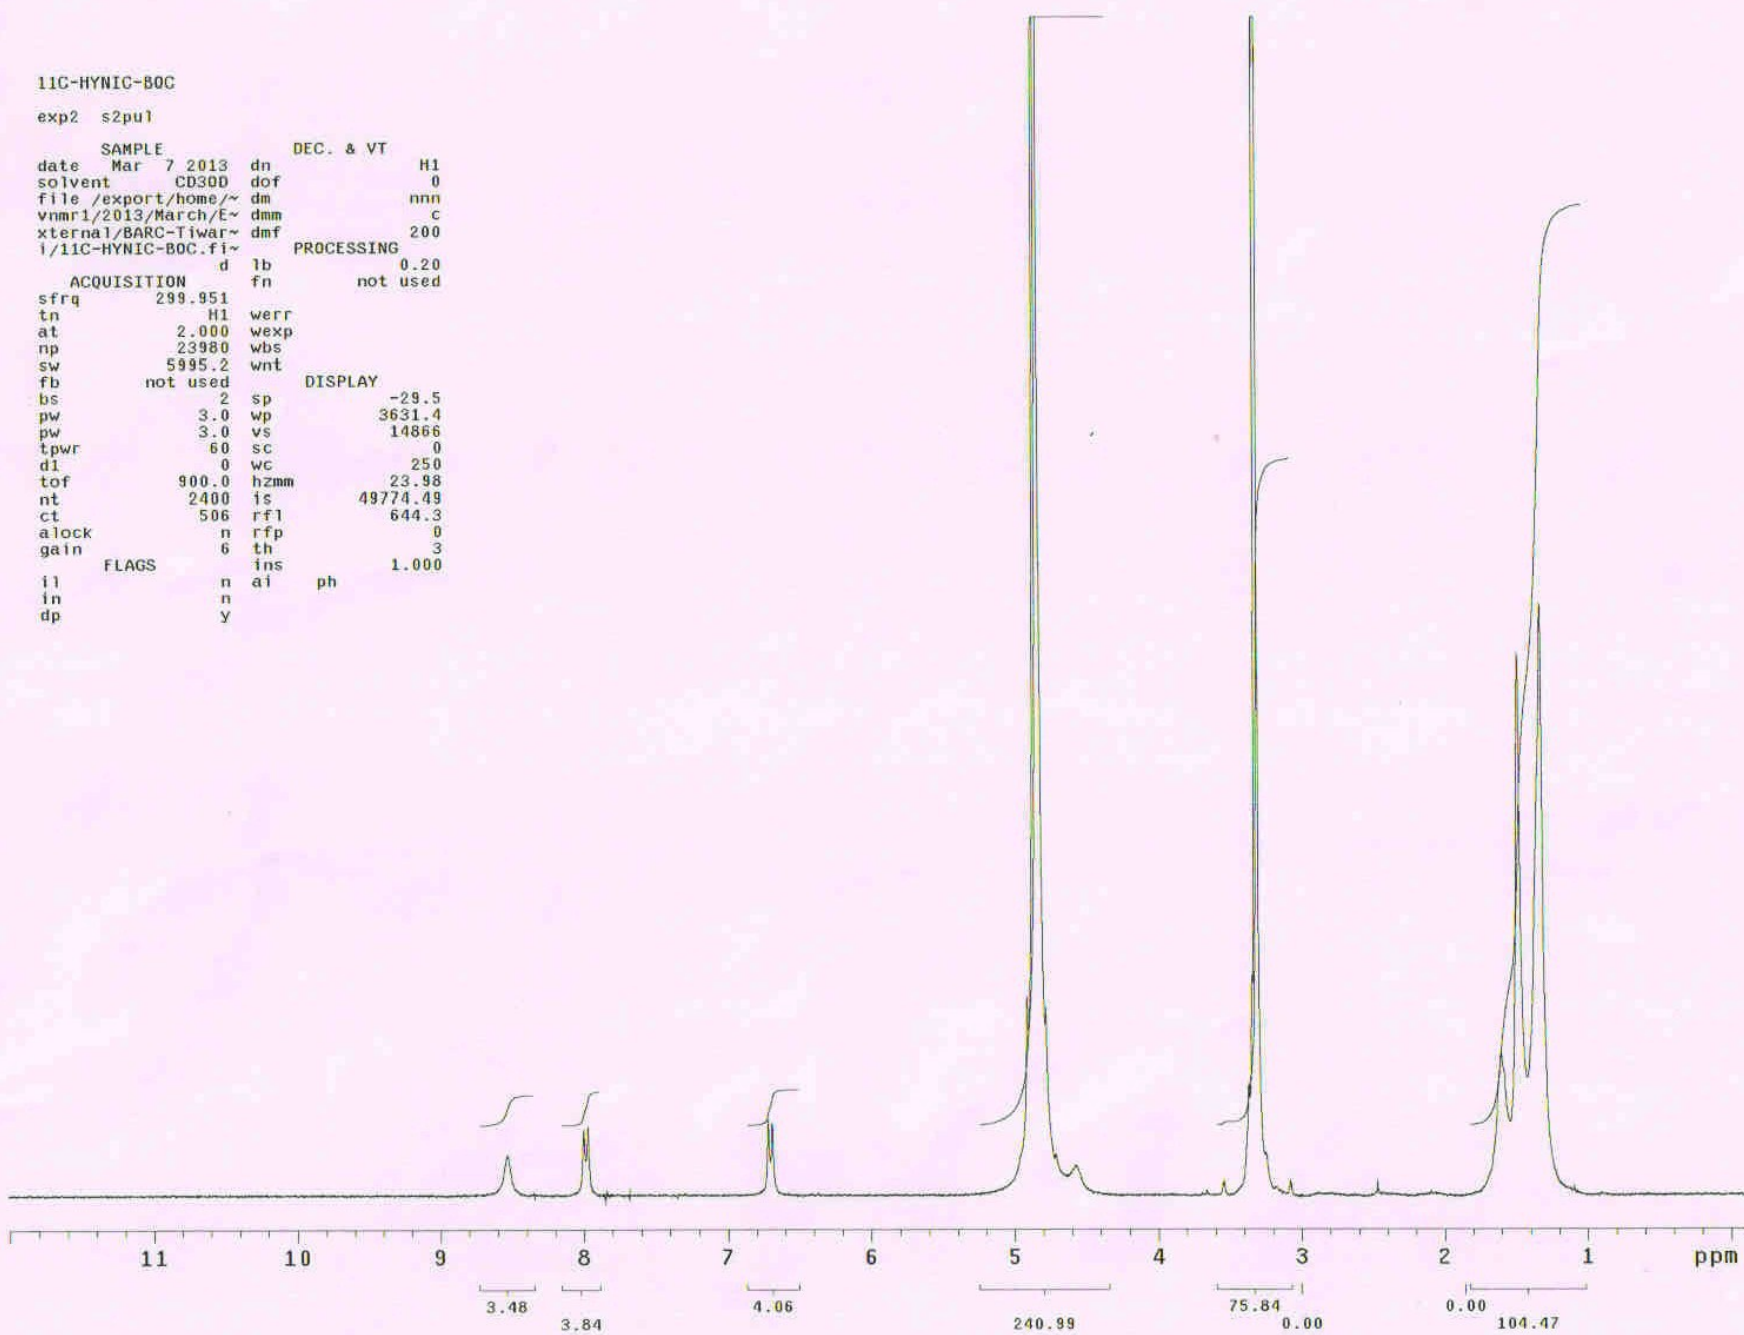

Supplement: c5ra12683e1.pdf [file c5ra12683e1.pdf]
