# Supplementary material for: Syntheses and biological evaluation of99mTc-HYNIC-fatty acid complexes for myocardial imaging
Source: Royal Society of Chemistry journal article supplement (doi:10.1039/c5ra12683e), 2015-01-01

```
HYD-11C-HYN
exp2 s2pu1

SAMPLE
date Mar 7 2013 dn H1
solvent CD3OD dof 0
file /export/home/~ dm nnn
vnmr1/2013/March/E~ dmm c
xternal/BARC-Tiwar~ dmf 200
i/HYD-11C-HYN.fid

ACQUISITION
sfrq 299.951 fb 0.10
tn H1 fn not used
at 2.000 werr
np 23980 wexp
sw 5995.2 wbs
fb not used wnt

DISPLAY
bs 2 sp -29.5
pw 3.0 wp 3631.4
tpwr 60 vs 19013
d1 0 sc 0
tof 900.0 wc 250
nt 2400 hzmm 14.53
ct 2386 is 75070.86
alock n rfl 644.3
gain 6 rfp 0
th 3
il n ins 1.000
in n al
dp y ph
```

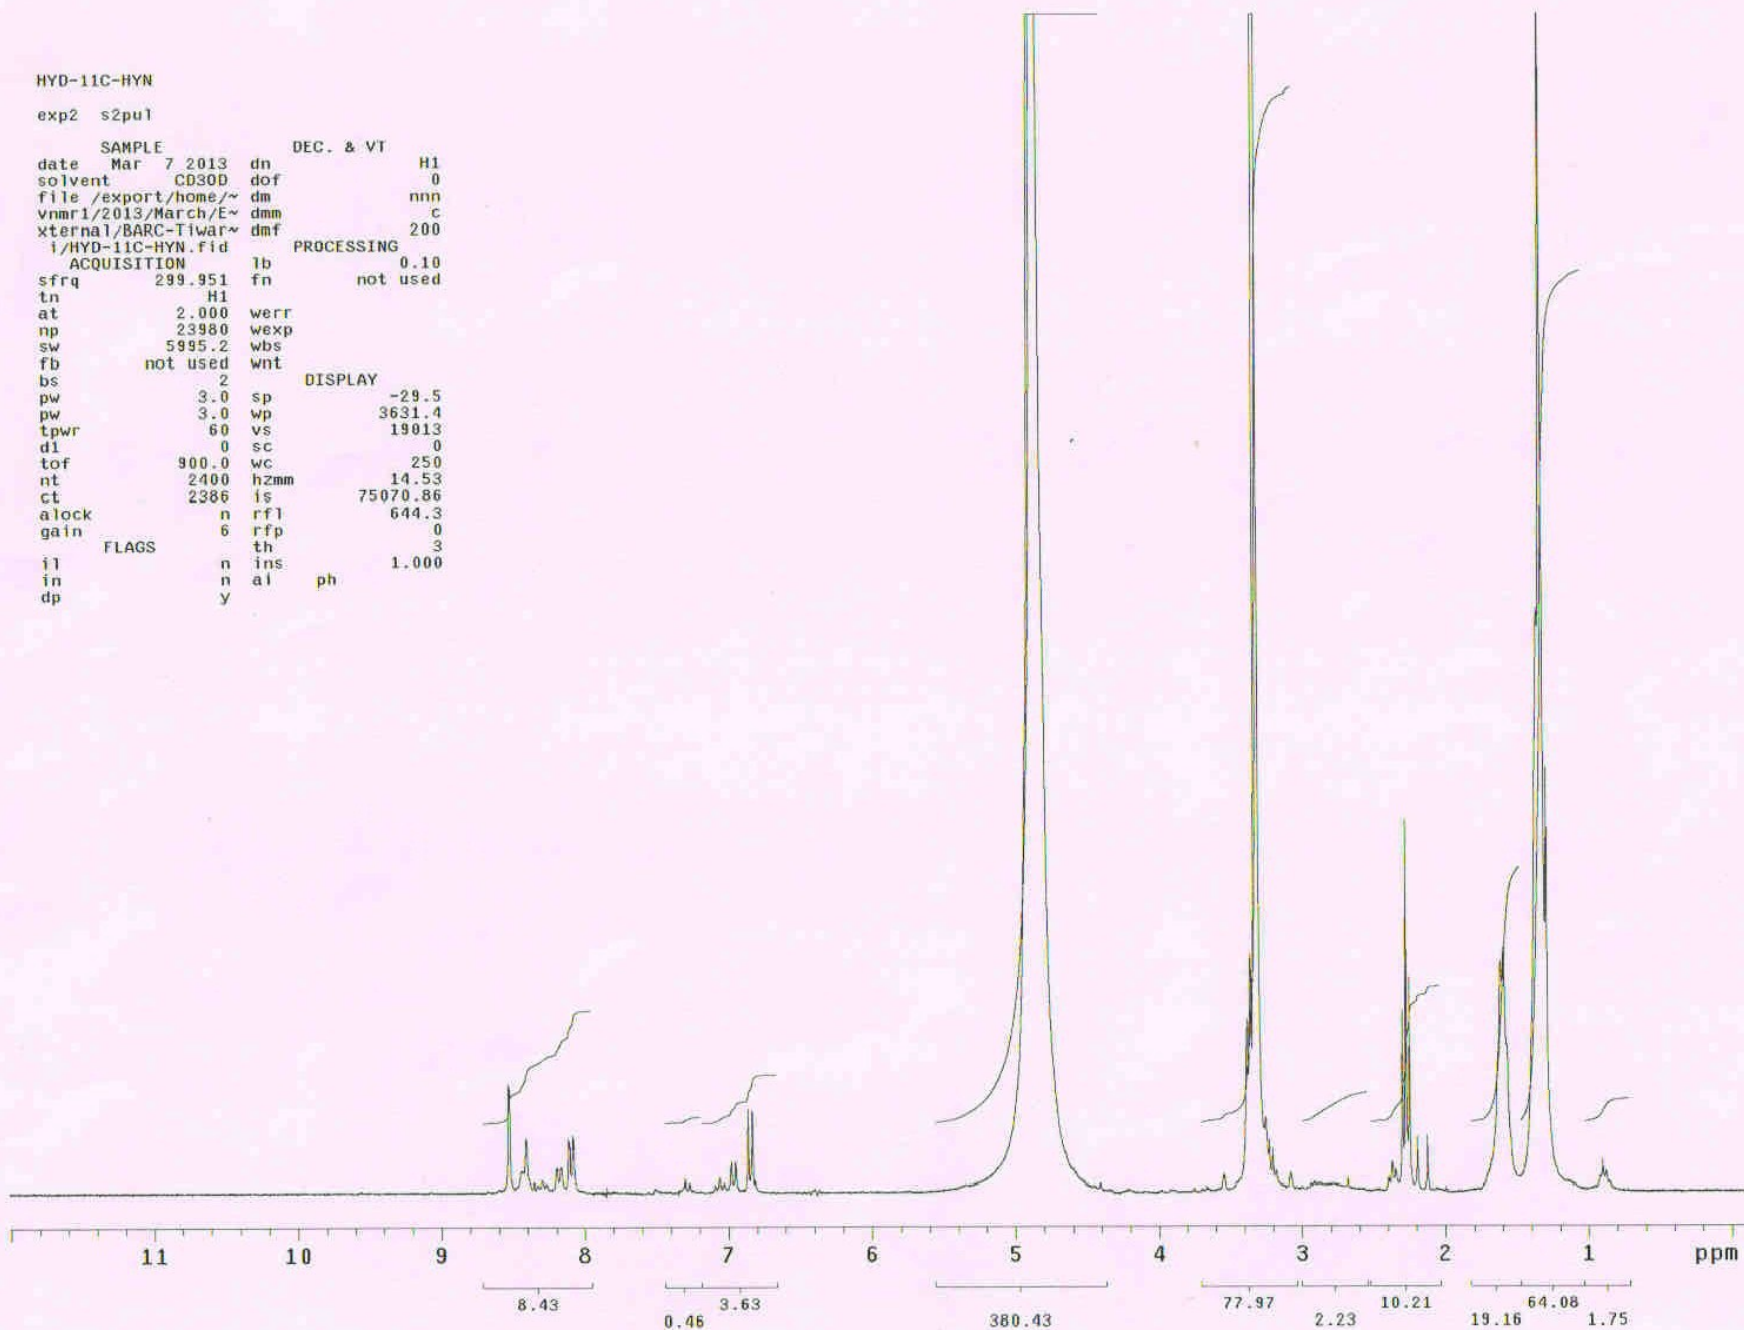

Supplement: c5ra12683e2.pdf [file c5ra12683e2.pdf]
