# Supplementary material for: Syntheses and biological evaluation of99mTc-HYNIC-fatty acid complexes for myocardial imaging
Source: Royal Society of Chemistry journal article supplement (doi:10.1039/c5ra12683e), 2015-01-01

```
HYD-000
exp2 s2pu1
SAMPLE
date Mar 7 2013 dn DEC. & VT H1
solvent CD3OD dof 0
file /export/home/~ dm nnn
vnmr1/2013/March/E~ dmm c
xternal/BARC-Tiwar~ dmf 200
i/HYD-000.Fid
ACQUISITION lb PROCESSING 0.10
sfrq 299.951 fn not used
tn H1
at 2.000 werr
np 23980 wexp
sw 5995.2 wbs
fb not used wnt
bs 2
pw 3.0 sp DISPLAY -29.5
pw 3.0 wp 3623.7
tpwr 60 vs 12006
d1 0 sc 0
tof 900.0 wc 250
nt 1600 hzmm 14.49
ct 314 is 80020.11
alock n rfl 1637.1
gain 6 rfp 992.8
FLAGS n th 3
il n ins 1.000
in n ai ph
dp y
```

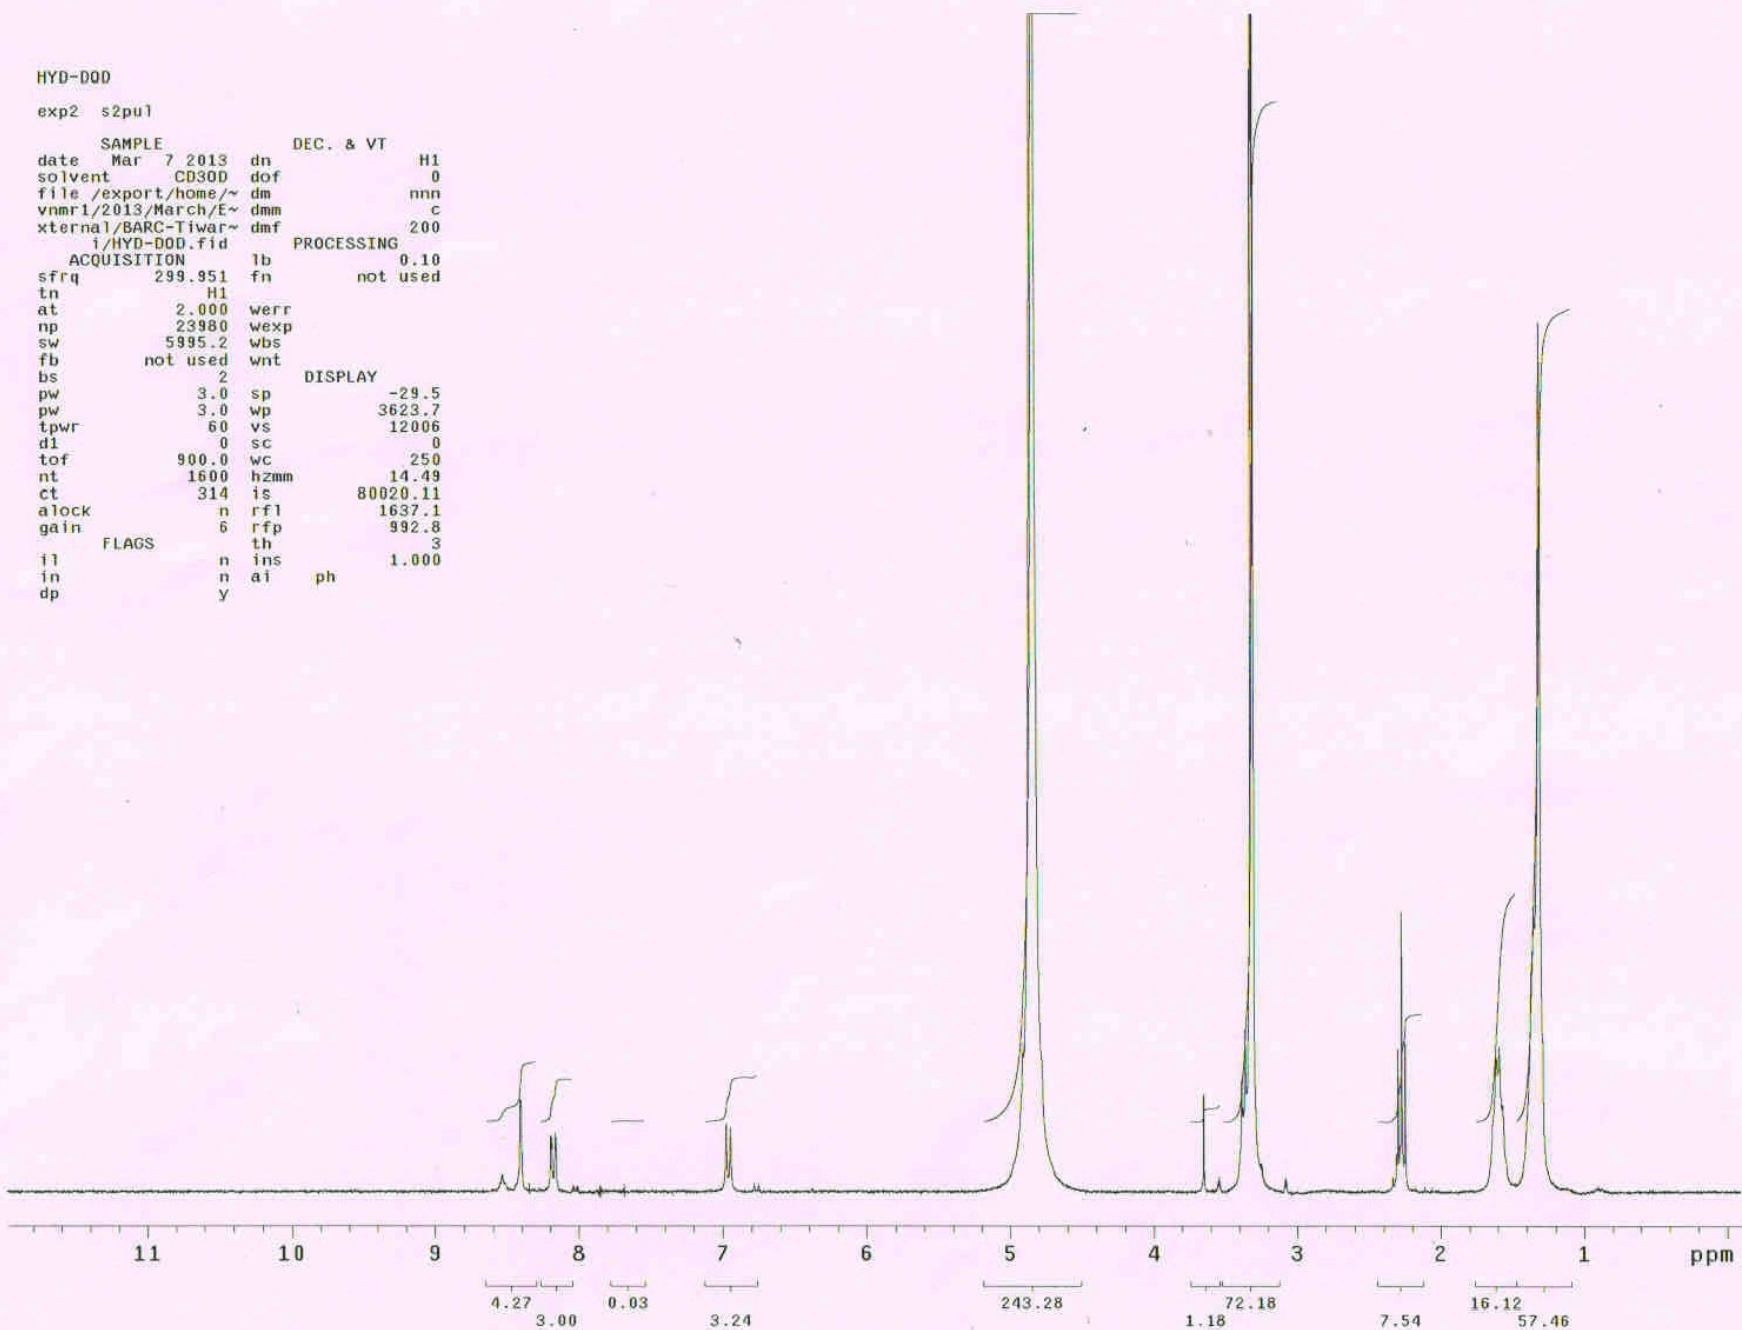

Supplement: c5ra12683e4.pdf [file c5ra12683e4.pdf]
