# Supplementary material for: Syntheses and biological evaluation of99mTc-HYNIC-fatty acid complexes for myocardial imaging
Source: Royal Society of Chemistry journal article supplement (doi:10.1039/c5ra12683e), 2015-01-01

Electronic Supplementary Material (ESI) for RSC Advances.  
This journal is © The Royal Society of Chemistry 2015

Spectrum RT 1.19 - 1.33 {12 scans}  
12C-FA-HYNIC\_is2 2015.08.08 16:23:39 ;  
ESI + Max: 1.1E8

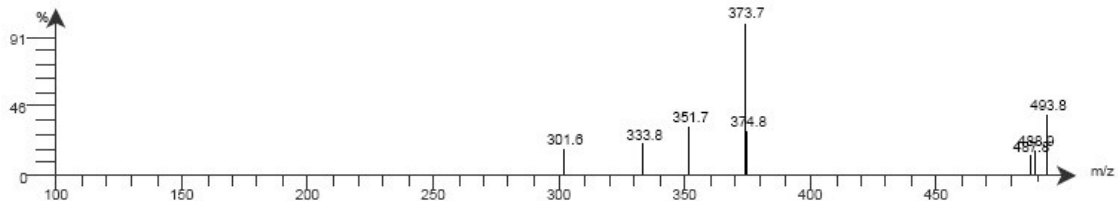

Supplement: c5ra12683e7.pdf [file c5ra12683e7.pdf]
