# Supplementary figures and images for: Syntheses and biological evaluation of99mTc-HYNIC-fatty acid complexes for myocardial imaging
Source: Royal Society of Chemistry journal article supplement (doi:10.1039/c5ra12683e), 2015-01-01

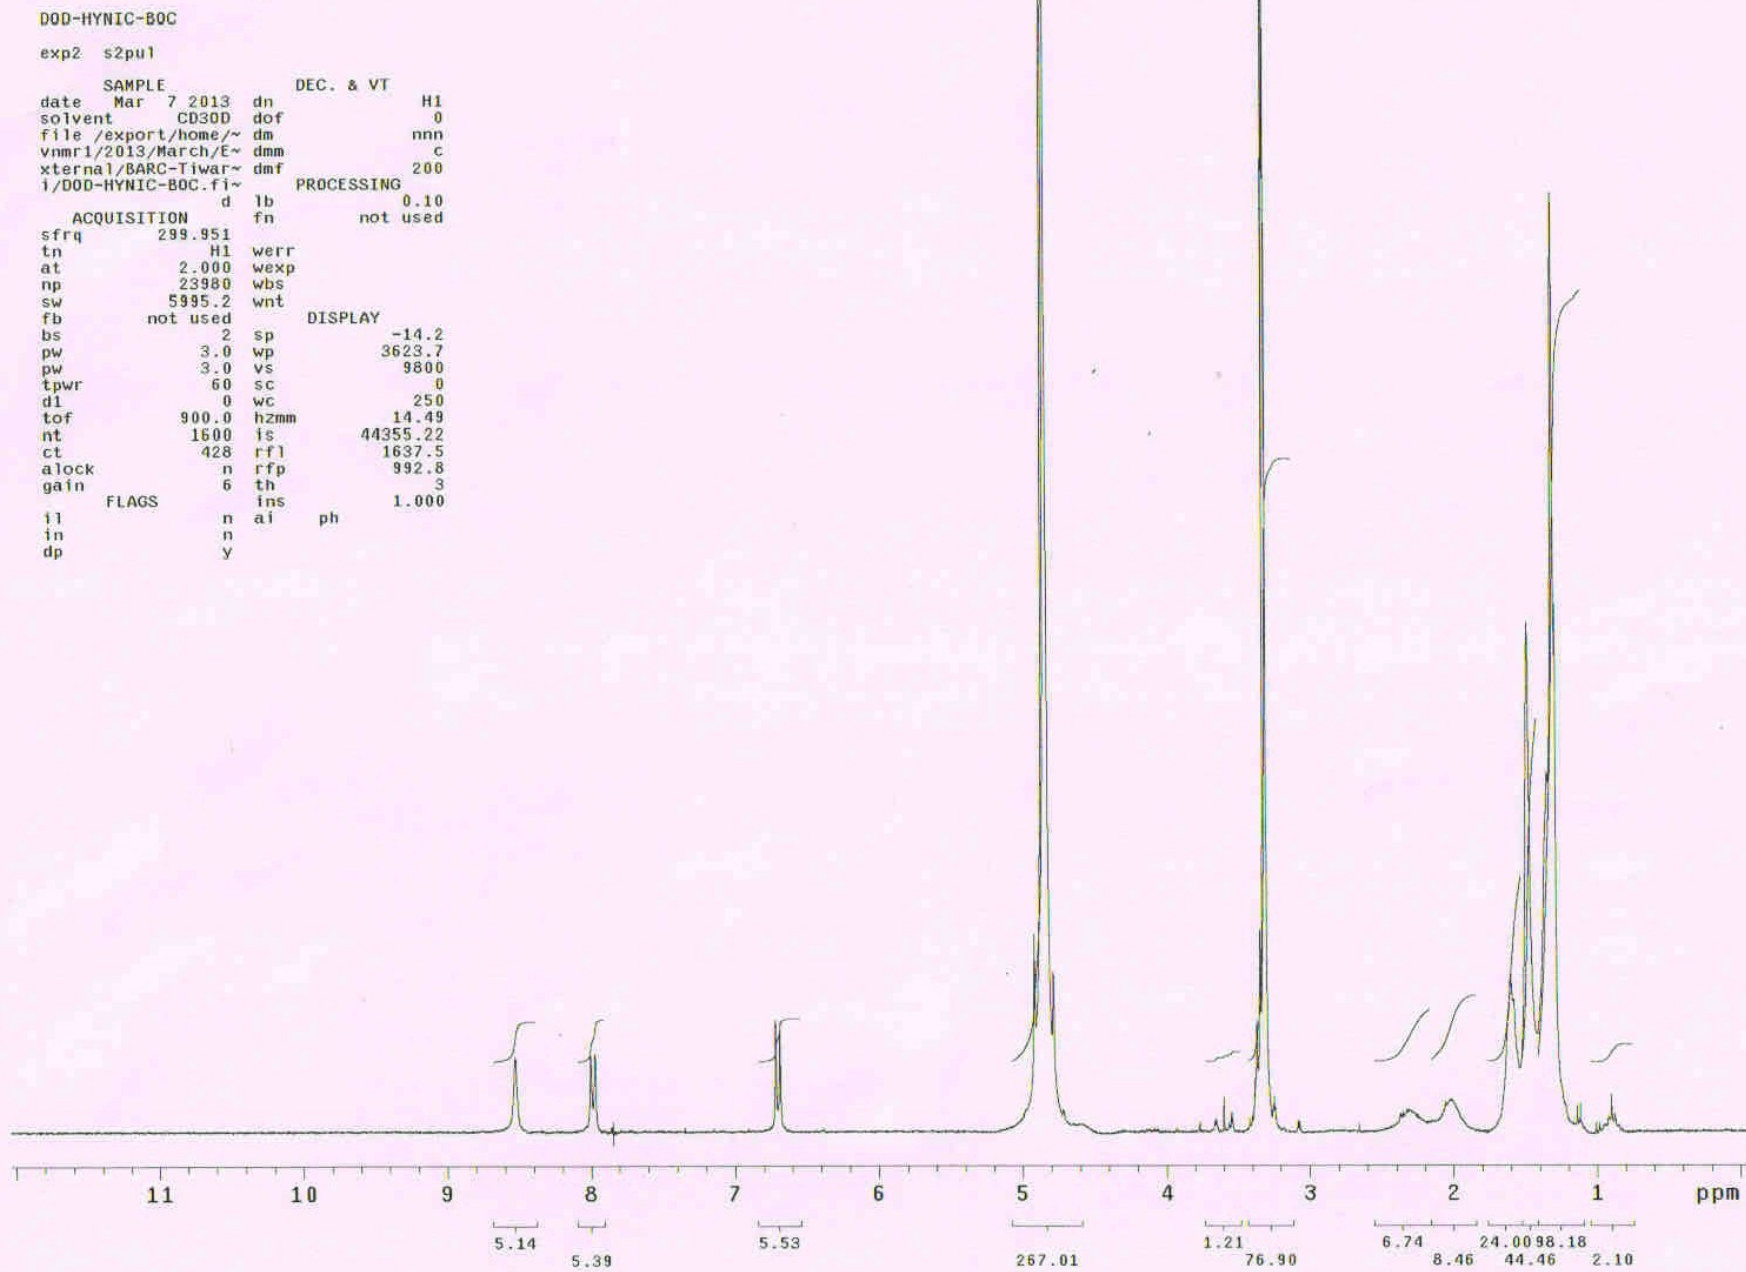

Supplement: c5ra12683e3.pdf [file c5ra12683e3.pdf]

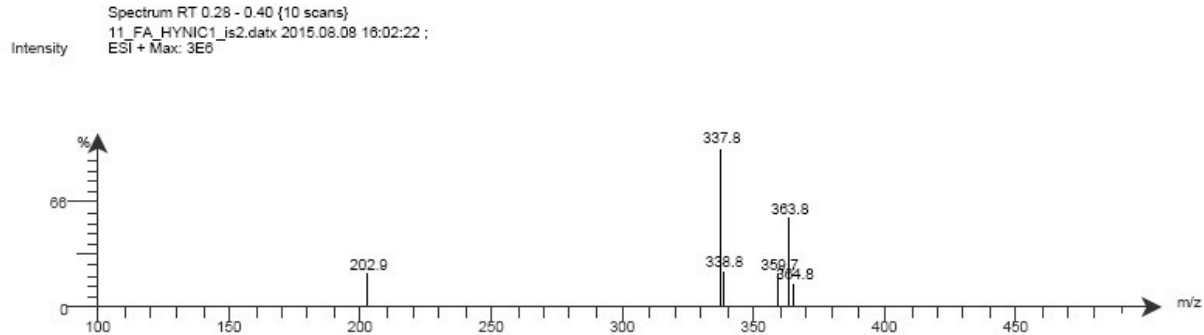

Supplement: c5ra12683e6.pdf [file c5ra12683e6.pdf]
